# Supplementary material for: GATA3 induces human T-cell commitment by restraining Notch activity and repressing NK-cell fate
Source: PubMed Central journal article supplement (PMC4823830; doi:10.1038/ncomms11171), 2016-04-06
Supplement: ncomms11171-s1.pdf [file ncomms11171-s1.pdf]

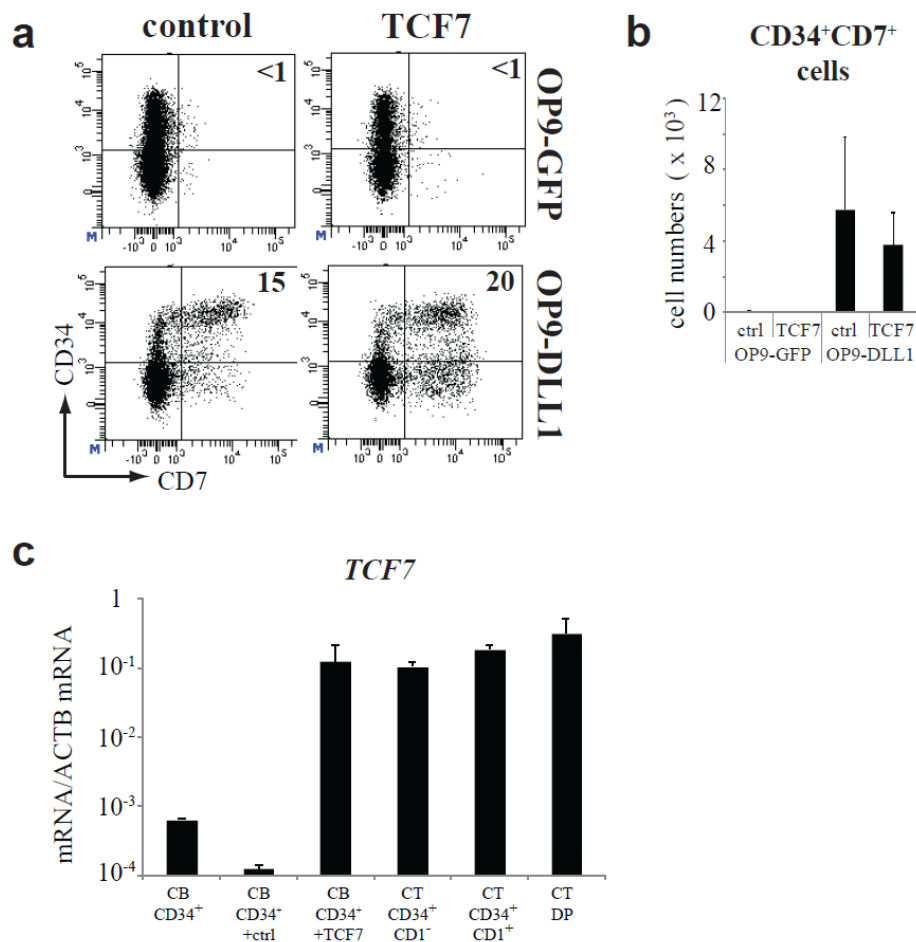

### Supplementary Figure 1. TCF1 by itself fails to induce human T-lineage specification

(a) Flow cytometry analysis of control and *TCF7* transduced cord blood CD34<sup>+</sup>lin<sup>-</sup> precursors in OP9-GFP and OP9-DLL1 co-cultures in the presence of IL7, SCF and FLT3L, showing the development of CD34<sup>+</sup>CD7<sup>++</sup> early T cell precursors after 6 days of co-culture. (b) Absolute numbers of CD34<sup>+</sup>CD7<sup>++</sup> T precursor cells developed in corresponding cultures from a. Data shows average of 3 independent experiments and error bars indicate SEM. (c) Quantitative PCR for *TCF7* expression in freshly isolated CB CD34<sup>+</sup> HPCs, in control and *TCF7* transduced CB CD34<sup>+</sup> HPCs and in ex vivo isolated intra-thymic CD34<sup>+</sup>CD1<sup>-</sup> uncommitted, CD34<sup>+</sup>CD1<sup>+</sup> T-lineage committed and DP thymocytes. Data shows the average expression of 2-4 independent experiments, relative to *ACTB* levels and error bars indicate SEM.

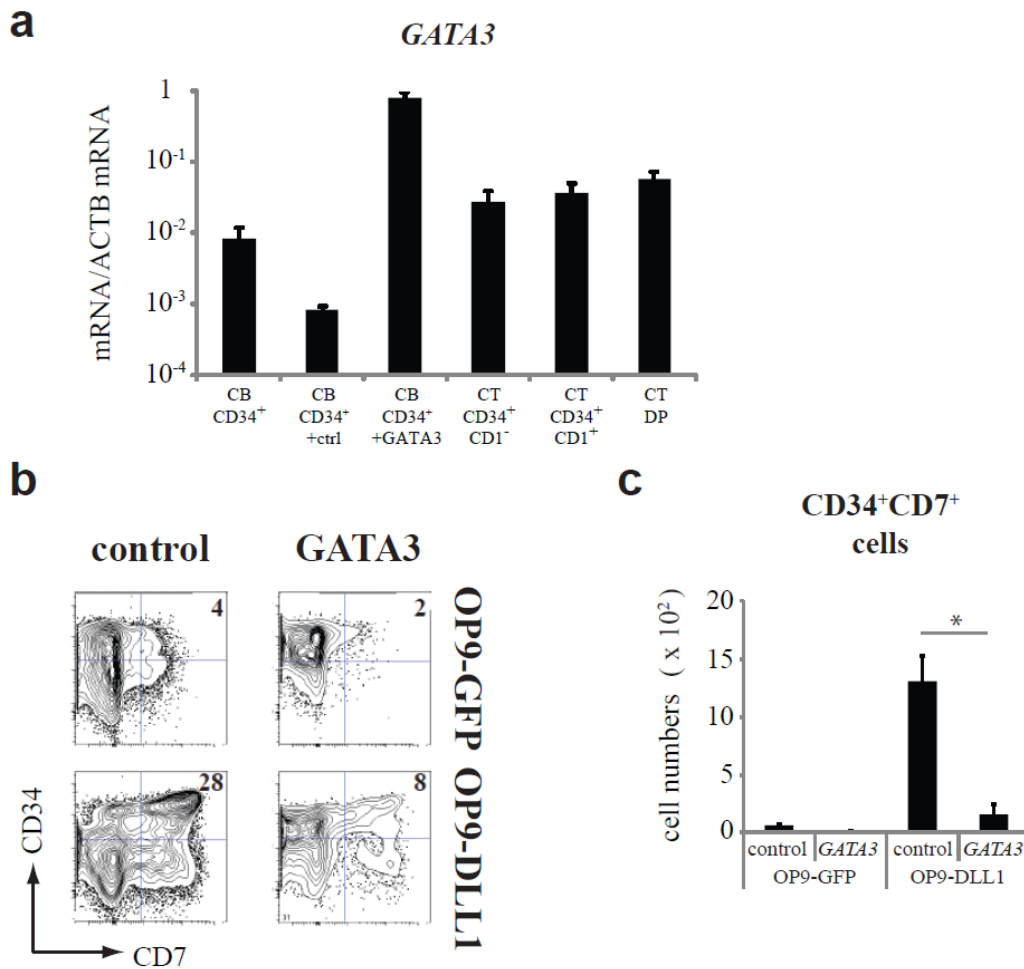

**Supplementary Figure 2. GATA-3 inhibits Notch-induced T cell specification.**

(a) Quantitative PCR for *GATA3* expression in freshly isolated CB CD34<sup>+</sup> HPCs, in control and *GATA3* transduced CB CD34<sup>+</sup> HPCs and in ex vivo isolated intra-thymic CD34<sup>+</sup>CD1<sup>-</sup> uncommitted, CD34<sup>+</sup>CD1<sup>+</sup> T-lineage committed and DP thymocytes. Data shows the average expression of 2-4 independent experiments, relative to *ACTB* levels and error bars indicate SEM. (b) Flow cytometry analysis of control and *GATA3* transduced cord blood CD34<sup>+</sup>lin<sup>-</sup> precursors in OP9-GFP and OP9-DLL1 co-cultures in the presence of IL7, SCF and FLT3L, showing the development of CD34<sup>+</sup>CD7<sup>++</sup> early T cell precursors after 6 days of co-culture. (c) Absolute numbers of CD34<sup>+</sup>CD7<sup>++</sup> T precursor cells developed in corresponding cultures from b. Data shows the average of 7 independent experiments and error bars indicate SEM. \*  $P < 0.05$  (non-parametric paired Wilcoxon test)

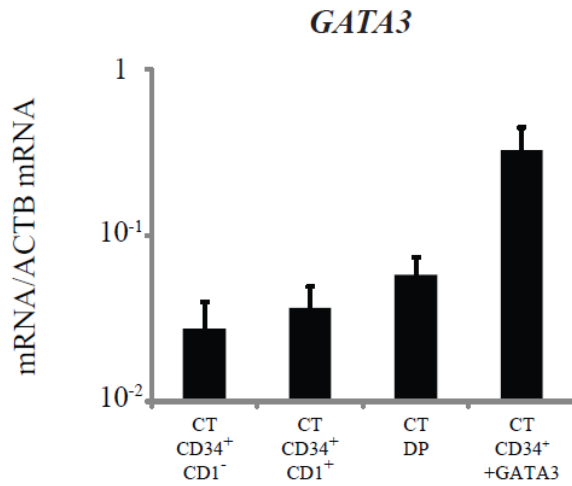

**Supplementary Figure 3. *GATA3* expression levels in *in vivo* and in transduced human thymocytes**

Quantitative PCR for *GATA3* expression in ex vivo isolated intra-thymic CD34<sup>+</sup>CD1<sup>-</sup> uncommitted, CD34<sup>+</sup>CD1<sup>+</sup> T-lineage committed, DP thymocytes and *GATA3* transduced CD34<sup>+</sup> thymocytes. Data shows the average expression of 2-4 independent experiments, relative to *ACTB* levels and error bars indicate SEM.

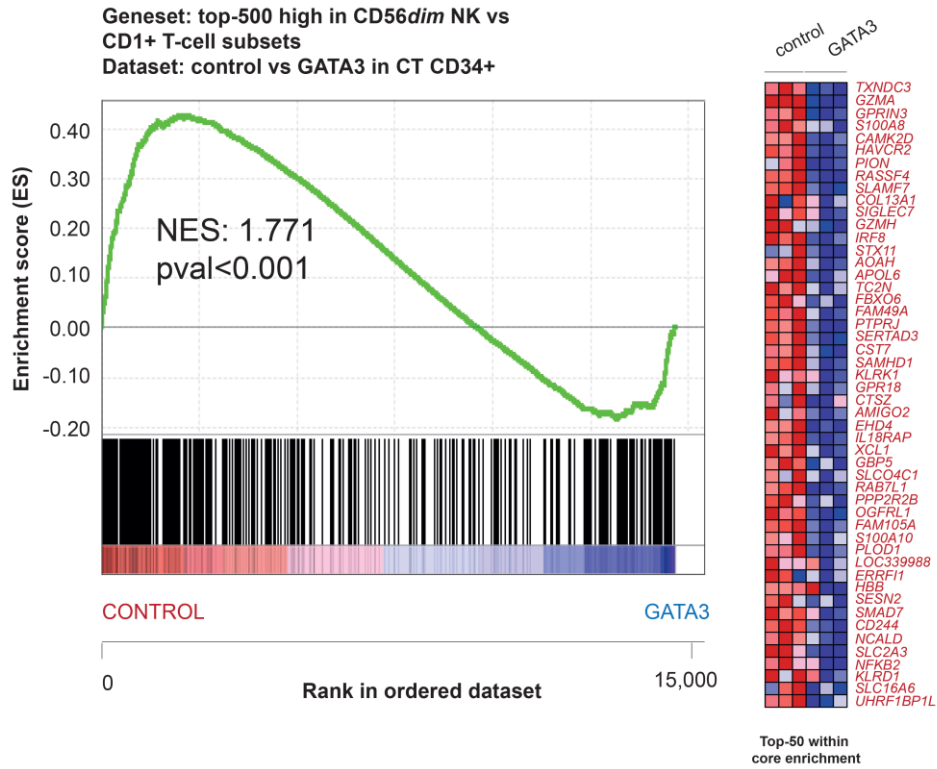

#### Supplementary Figure 4. GATA3 inhibits expression of NK-cell signature genes

GSEA shows a significant enrichment for CD56<sup>bright</sup> human NK cells signature genes in control versus GATA3 transduced human CD34<sup>+</sup> thymocytes.

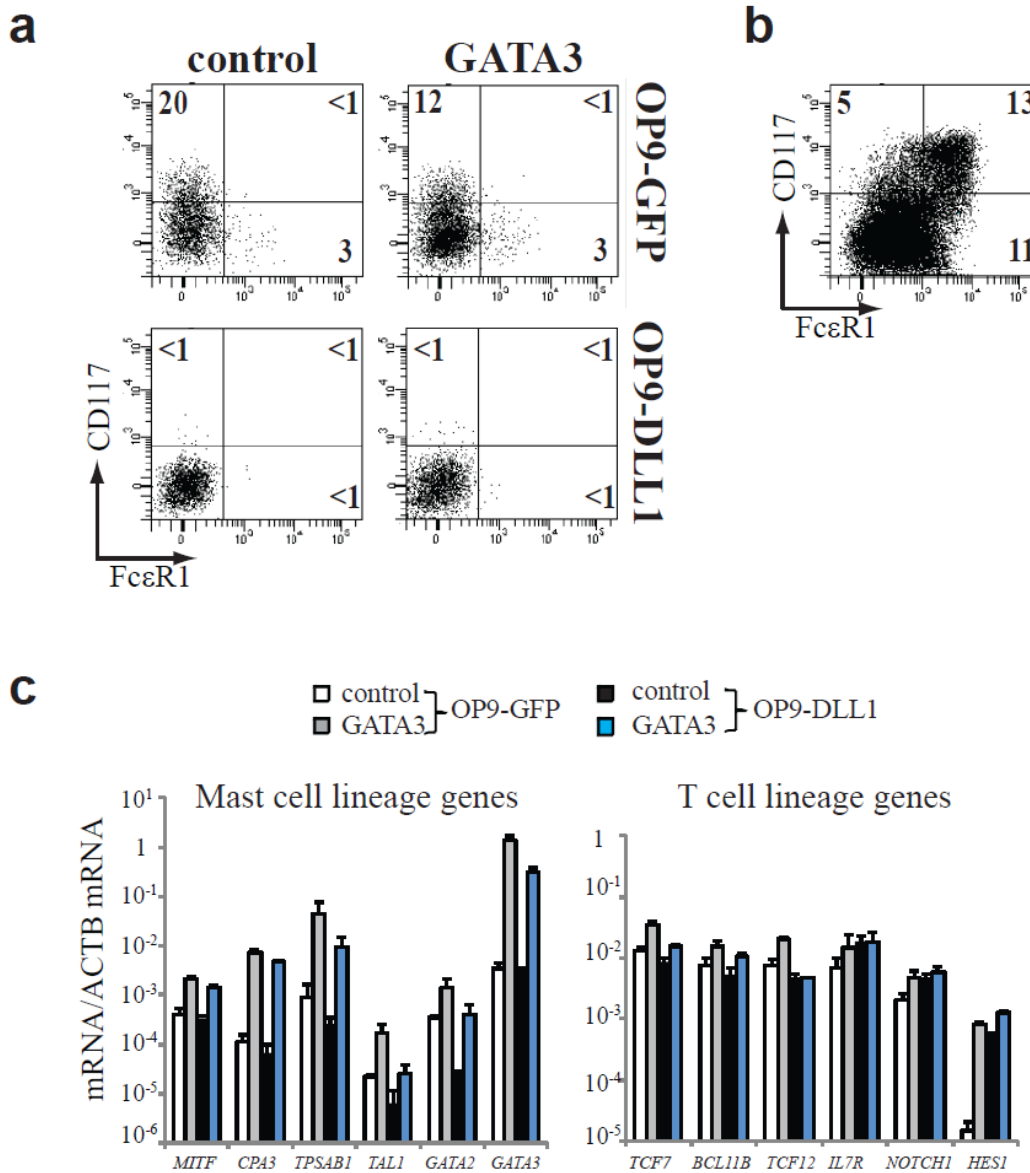

**Supplementary Figure 5. GATA3 overexpression does not induce mast cell development.**

(a) Flow cytometry analysis of CD117 versus FcεR1 staining in control and *GATA3* transduced CD34<sup>+</sup>CD1<sup>-</sup> uncommitted thymocytes in OP9-GFP and OP9-DLL1 co-cultures. Data is representative for 3 independent experiments. (b) Flow cytometry analysis of CD117<sup>+</sup>FcεR1<sup>+</sup> mast cells derived from CD34<sup>+</sup> CB HPCs after 19 days of culture. (c) Quantitative PCR analysis of changes of gene expression in control (white and black bars) and *GATA3* (grey and blue bars) transduced CD34<sup>+</sup> thymocytes after 2 day co-culture on OP9-GFP (white and grey bars) or OP9-DLL1 (black and blue bars). Data show the average expression of 2 independent experiments, relative to ACTB levels. Error bars indicate SEM.

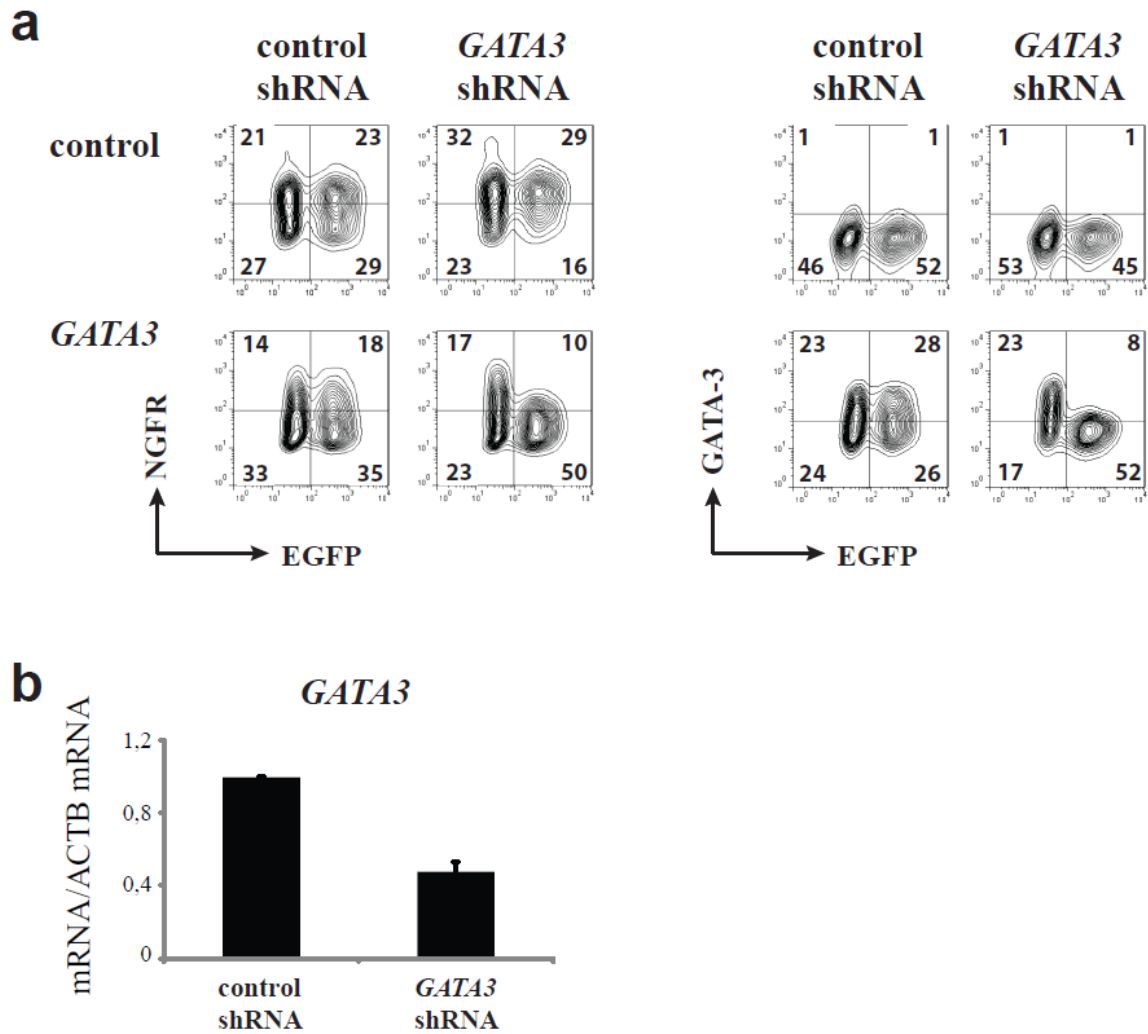

**Supplementary Figure 6. *GATA3* directed shRNA reduces *GATA3* protein and mRNA levels**

(a) Flow cytometry analysis of HL60 cells, transduced with a control-IRES-NGFR or *GATA3*-IRES-NGFR retroviral vector, combined with a EGFP encoding control shRNA or *GATA3* shRNA lentiviral vectors, showing NGFR versus EGFP (left) or intracellular *GATA3* versus EGFP (right) expression. Both NGFR and *GATA3* expression are reduced in case of *GATA3* shRNA-mediated knockdown, indicating that the shRNA enhances degradation of the bicistronic mRNA. (b) Quantitative PCR for *GATA3* expression in control shRNA and *GATA3* shRNA transduced CD34<sup>+</sup> thymocytes, 48 hours after transduction. Data shows the average expression of 3 independent experiments, relative to *ACTB* levels and relative to control shRNA transduced cells. Error bars indicate SEM.

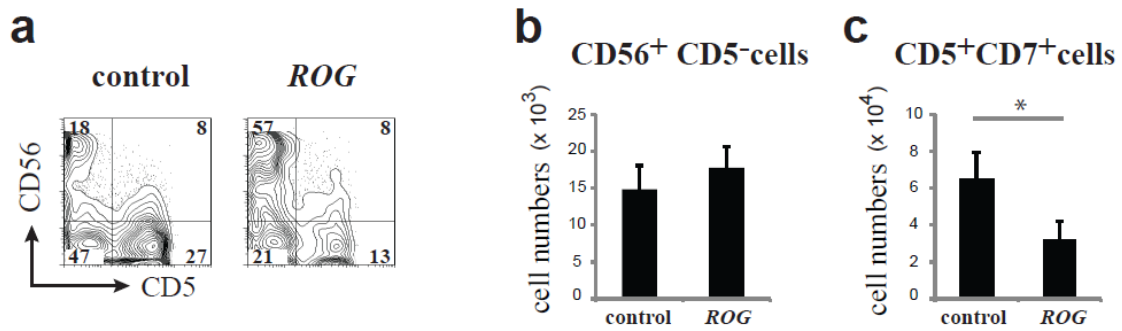

**Supplementary Figure 7. ROG overexpression confirms differential GATA3 requirement for T and NK cell development .**

(a) Flow cytometry analysis of control and *ROG* transduced CD34<sup>+</sup> CB progenitors in 2-week OP9-DLL1 co-cultures in the presence of IL7, SCF, FLT3L and IL15. Graphs show absolute number of CD56<sup>+</sup> CD5<sup>-</sup> NK cells (b) and CD5<sup>+</sup> CD7<sup>+</sup> T cells (c) that developed in corresponding cultures from a. Data shows the average of 5 independent experiments and error bars indicate SEM. \*  $P < 0.05$  (non-parametric paired Wilcoxon test)

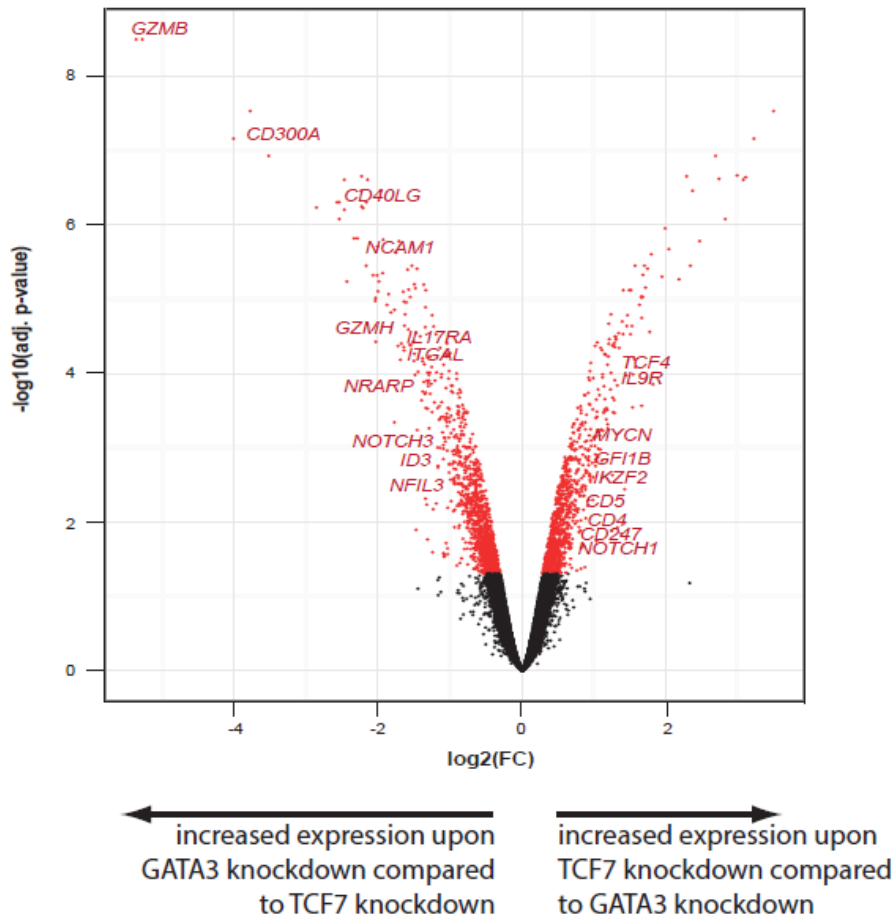

**Supplementary Figure 8. GATA3 and TCF7 have unique regulatory roles.**

Volcano plot showing genes with significant differential expression between TCF7 and GATA3 shRNA transduced RPMI-8402 cells. Data shows significant differentially expressed genes over 2 independent experiments. Red dots represent the significant differentially expressed genes (adjusted  $P$ -value  $< 0.05$ ).



**a**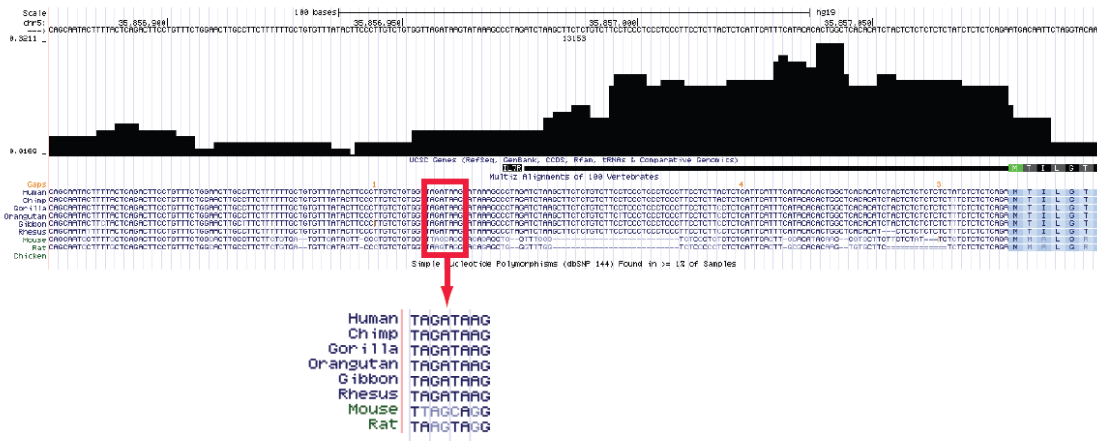**b**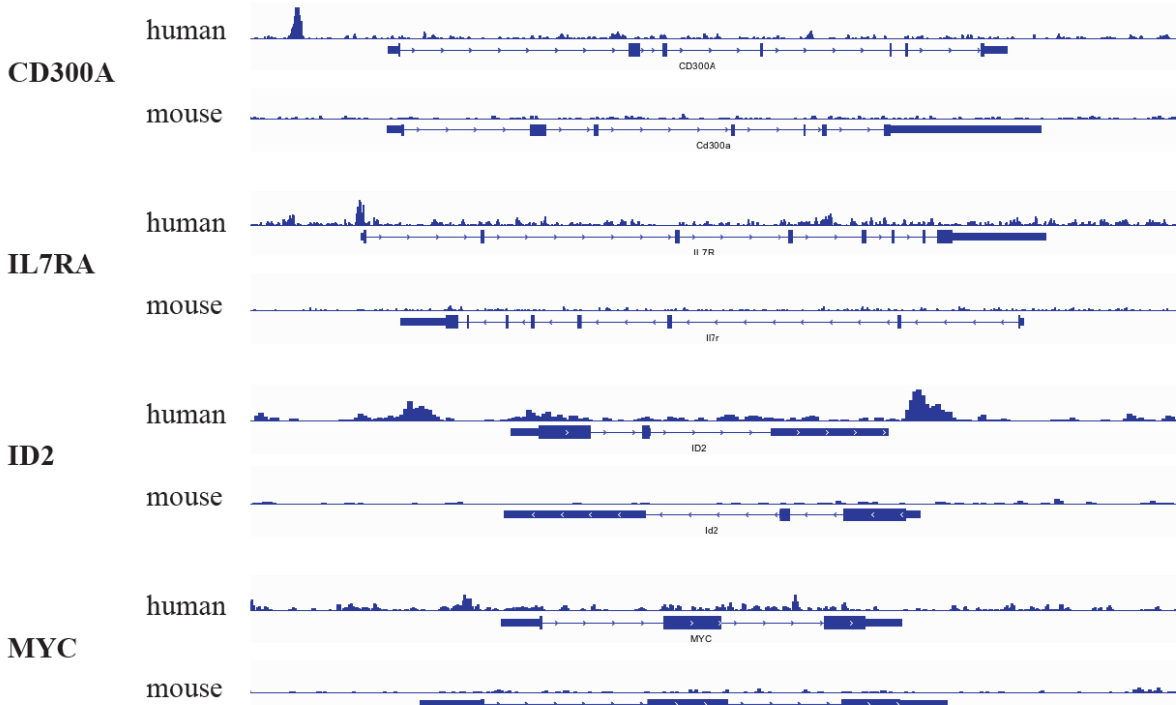

### Supplementary Figure 9. GATA3 occupancy across species

(a) UCSC genome browser view of GATA3 binding at the human IL7R locus, showing conservation of the GATA binding site in primates, but not rodents. (b) GATA3 binding at selected gene loci in human total thymocytes versus mouse DN2b thymocytes<sup>1</sup>.

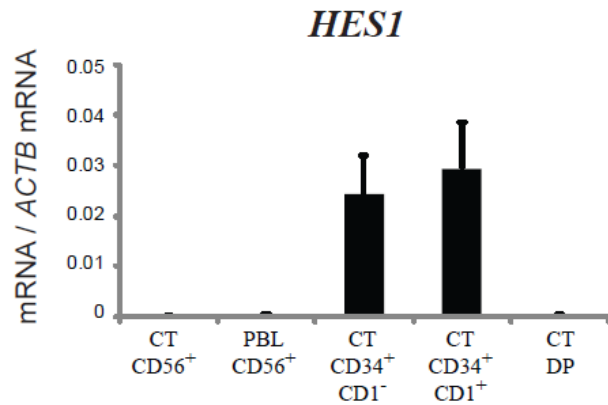

**Supplementary Figure 10. Thymic NK cells do not show global signs of Notch activation**

Quantitative PCR for *HES1* expression in thymus (CT) and peripheral blood (PBL) CD56<sup>+</sup> NK cells, compared to intra-thymic CD34<sup>+</sup>CD1<sup>-</sup> uncommitted and CD34<sup>+</sup>CD1<sup>+</sup> committed progenitors and DP thymocytes. Data shows average expression, relative to *ACTB*, of 2-5 independent samples and error bars indicate SEM.

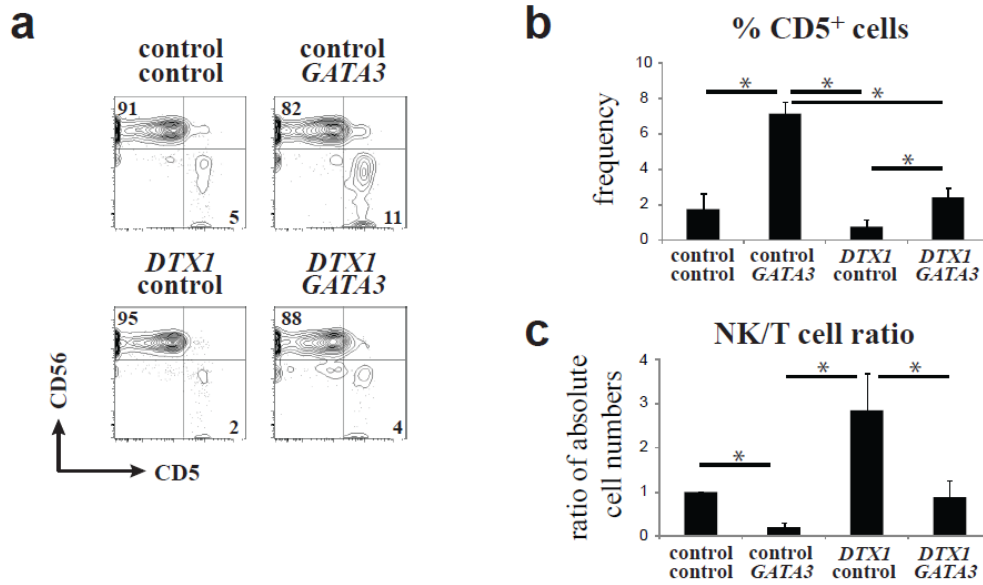

**Supplementary Figure 11. The balance between DTX1 and GATA3 levels determines intrathymic NK vs T cell development.**

(a) Flow cytometry analysis of control-control, control-*GATA3*, *DTX1*-control and *DTX1*-*GATA3* double transduced CD34<sup>+</sup>CD1<sup>-</sup> uncommitted thymocytes in 2-week OP9-DLL1 co-cultures in the presence of IL7, SCF, FLT3L and IL15. (b) Average frequency of CD5<sup>+</sup> T-lineage cells from cultures in a. (c) NK/T cell ratio from cultures depicted in a. Data shows the average of 4 independent experiments and error bars indicate SEM. \*  $P < 0.05$  (paired t-test)

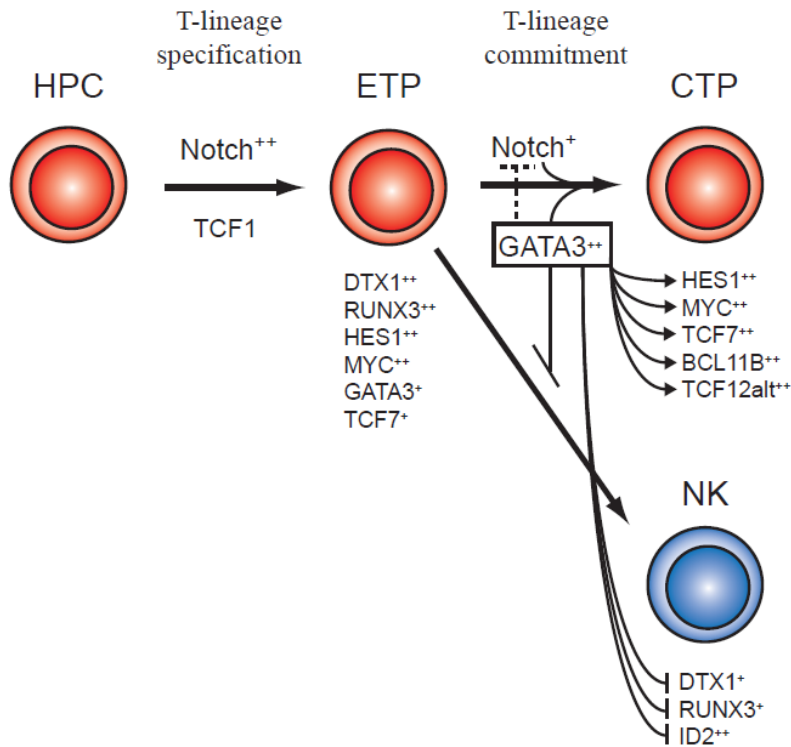

**Supplementary Figure 12. Molecular regulation of human T cell commitment.**

Schematic overview of the molecular processes that control early T cell development in human, with focus on GATA3-mediated effects on the induction of human T cell commitment at the expense of NK cell development. HPC: hematopoietic precursor cell; ETP: early T-cell precursor; CTP: committed T-cell precursor. Dotted line indicates partial inhibition.

## Supplementary Reference

1. Zhang, J.A., Mortazavi, A., Williams, B.A., Wold, B.J., & Rothenberg, E.V. Dynamic transformations of genome-wide epigenetic marking and transcriptional control establish T cell identity. *Cell* **149**, 467-482 (2012).
